# Supplementary material for: Adult liver transplantation: UK clinical guideline - part 2: surgery and post-operation
Source: PubMed Central journal article supplement — Frontline Gastroenterol. 2020 Feb 25;11(5):385–96. doi: 10.1136/flgastro-2019-101216 (PMC7447281; doi:10.1136/flgastro-2019-101216), 2020-02-25
Supplement: flgastro-2019-101216supp001.pdf [file flgastro-2019-101216supp001.pdf]

## Appendix 1: Surgical Complications

| COMPLICATION              | Frequency                 | PRESENTATION                                                                                                        | TREATMENT                                                                                                                                                                                                          |
|---------------------------|---------------------------|---------------------------------------------------------------------------------------------------------------------|--------------------------------------------------------------------------------------------------------------------------------------------------------------------------------------------------------------------|
| Primary Non Function      | 1-5%                      | Coagulopathy persists and graft fails to clear bilirubin                                                            | As liver failure persists, risk of sepsis, particularly fungal sepsis grows. Re-graft must be considered                                                                                                           |
| Hepatic Artery Thrombosis | 2-5%                      | May present with very high transaminase, but biliary tree very vulnerable so usually seen with rising bilirubin etc | Re-canalisation of artery is rarely effective. Re-graft is often the only option in the first 21 days post surgery. After that time, vascular intervention, either surgically or radiologically may be successful. |
| Portal Vein Thrombosis    | 1-3%                      | Bleeding, variceal bleeding, persist raised transaminase etc                                                        | Recanalisation achieved either with anticoagulation or less commonly with radiologically.                                                                                                                          |
| Biliary leak              | 2-25%                     | Infection, or incidental finding on post-op imaging                                                                 | ERCP and stenting if anastomotic. If from bare area – drainage is usually adequate                                                                                                                                 |
| Biliary stricture         | 5-15%<br>(up to 30% LDLT) | Jaundice                                                                                                            | Re-fashioning after stenting                                                                                                                                                                                       |
| Bleeding                  | 5%                        | Falling Blood pressure, drop in haemoglobin etc                                                                     | Consider re-laparotomy                                                                                                                                                                                             |
