# Supplementary material for: Adult liver transplantation: UK clinical guideline - part 2: surgery and post-operation
Source: HighWire-hosted journal article supplement (doi:10.1136/flgastro-2019-101216), 2020-02-25
Supplement: flgastro-2019-101216supp002_data_supplement.pdf [file flgastro-2019-101216supp002_data_supplement.pdf]

## Appendix 2: Classifications of commoner drugs used to prevent liver rejection

\*indicates not specifically licensed in UK for use in liver transplantation

| <b>MODE OF ACTION</b>                                       | <b>NAME</b>                                                                                                       |
|-------------------------------------------------------------|-------------------------------------------------------------------------------------------------------------------|
| <b>Depletion of lymphocytes</b>                             | Polyclonal antibodies: ALG, thymoglobulin<br>Monoclonal antibodies: OKT3, Alemtuzumab*                            |
| <b>Inhibition of lymphocyte activation</b>                  | Antibodies:<br>IL2R antibodies: Basiliximab, Daclizumab<br>Anti CD80/86 antibodies: Belatacept*                   |
| <b>Corticosteroids*</b>                                     | Prednisolone, methylprednisolone                                                                                  |
| <b>Immunophilin-binding drugs</b>                           | Calcineurin inhibitors (CNI): Cyclosporin and tacrolimus<br>mTOR Inhibitors: Sirolimus*, Everolimus               |
| <b>Inhibition of de novo nucleotide synthesis</b>           | Purine synthesis inhibitors (IMPDH):<br>mycophenolate<br>Pyrimidine synthesis inhibitors (DHODH):<br>Leflunomide* |
| <b>Anti-metabolites:</b>                                    | Azathioprine, cyclophosphamide*                                                                                   |
| <b>Inhibitors of lymphocyte trafficking and interaction</b> | Fingolimod*<br>Antibodies to ICAM-1                                                                               |

ALG: anti-lymphocyte globulin; TOR: target of rapamycin; IMPDH: inosine monophosphate dehydrogenase; DHODH: Dihydroorotate dehydrogenase  
IL2R: interleukin-2 receptor; ICAM: intercellular adhesion molecule
