# Supplementary material for: Adult liver transplantation: UK clinical guideline - part 2: surgery and post-operation
Source: PubMed Central journal article supplement — Frontline Gastroenterol. 2020 Feb 25;11(5):385–96. doi: 10.1136/flgastro-2019-101216 (PMC7447281; doi:10.1136/flgastro-2019-101216), 2020-02-25
Supplement: flgastro-2019-101216supp003.pdf [file flgastro-2019-101216supp003.pdf]

### Appendix 3: A brief summary of some of the main features of Rejection post liver transplant

| Previous terminology       | Preferred terminology                                                                        | Principle histological features                                                                                                                        | Diagnostic methods                                                                                                                                                                                                                          | Management                                                                                                                                                       |
|----------------------------|----------------------------------------------------------------------------------------------|--------------------------------------------------------------------------------------------------------------------------------------------------------|---------------------------------------------------------------------------------------------------------------------------------------------------------------------------------------------------------------------------------------------|------------------------------------------------------------------------------------------------------------------------------------------------------------------|
| (Acute) cellular rejection | T-cell mediated rejection (TCMR)<br>Early defined as <6 months<br>Late defined as > 6 months | Portal inflammation<br>Bile duct inflammation damage<br>Venous endothelial inflammation<br>Centrilobular inflammation and necrosis (in severe cases)   | Liver function tests<br>Liver biopsy                                                                                                                                                                                                        | High doses of pulsed steroids<br>Consider MMF if not already on the drug<br>Increase target drug levels for CNI therapy                                          |
| (Acute)humoral rejection   | (Acute) antibody mediated rejection (AMR)                                                    | Microvasculitis<br>Portal eosinophilia<br>Portal vein endothelial hypertrophy<br>Eosinophilic venulitis                                                | Liver function tests<br>Immunology<br>Liver biopsy<br><br>All four criteria required for definite diagnosis:<br>1. Compatible histology<br>2. Positive serum DSA<br>3. Diffuse (>50%) C4d staining<br>4. Exclusion of other possible causes | Treat as TCMR rejection in mild forms<br>Moderate to severe – consider plasmapheresis and IVIg with or without anti B-cell therapy.                              |
| Chronic rejection          | Chronic rejection                                                                            | Bile duct loss<br>Loss of arterioles in portal tracts.<br>Obliterative arteriopathy in large and medium-sized arteries.<br>Cholestasis in late stages. | Liver function tests<br>Liver biopsy                                                                                                                                                                                                        | Consider MMF if not already on the drug<br>Increase target drug levels for CNI therapy.<br>Consider anti B cell therapy in cases of “acute ductopenic rejection” |
