# Supplementary material for: Adult liver transplantation: UK clinical guideline - part 2: surgery and post-operation
Source: PubMed Central journal article supplement — Frontline Gastroenterol. 2020 Feb 25;11(5):385–96. doi: 10.1136/flgastro-2019-101216 (PMC7447281; doi:10.1136/flgastro-2019-101216), 2020-02-25
Supplement: flgastro-2019-101216supp004.pdf [file flgastro-2019-101216supp004.pdf]

## Appendix 4: Follow –up clinic proforma

## LIVER TRANSPLANT CLINIC

|                                                                                                                 |                                                                                                                                                                                                                                                                                                                                                                                                                                                                                                                                                                                                                                                                                                                                          |                            |                            |     |                            |     |     |      |        |     |     |            |        |     |     |     |        |         |        |    |        |    |     |       |        |     |                     |            |                     |          |                     |    |   |            |      |        |      |
|-----------------------------------------------------------------------------------------------------------------|------------------------------------------------------------------------------------------------------------------------------------------------------------------------------------------------------------------------------------------------------------------------------------------------------------------------------------------------------------------------------------------------------------------------------------------------------------------------------------------------------------------------------------------------------------------------------------------------------------------------------------------------------------------------------------------------------------------------------------------|----------------------------|----------------------------|-----|----------------------------|-----|-----|------|--------|-----|-----|------------|--------|-----|-----|-----|--------|---------|--------|----|--------|----|-----|-------|--------|-----|---------------------|------------|---------------------|----------|---------------------|----|---|------------|------|--------|------|
| <b>Name:</b><br><b>Address:</b>                                                                                 |                                                                                                                                                                                                                                                                                                                                                                                                                                                                                                                                                                                                                                                                                                                                          |                            |                            |     |                            |     |     |      |        |     |     |            |        |     |     |     |        |         |        |    |        |    |     |       |        |     |                     |            |                     |          |                     |    |   |            |      |        |      |
|                                                                                                                 |                                                                                                                                                                                                                                                                                                                                                                                                                                                                                                                                                                                                                                                                                                                                          | <b>DOB:</b><br><b>NHS:</b> |                            |     |                            |     |     |      |        |     |     |            |        |     |     |     |        |         |        |    |        |    |     |       |        |     |                     |            |                     |          |                     |    |   |            |      |        |      |
| <b>Transplant:</b><br>Date:<br>Centre:<br>Indication:                                                           | <b>Biliary anastomosis:</b><br><b>Immunosuppression History:</b><br><b>Rejection history:</b>                                                                                                                                                                                                                                                                                                                                                                                                                                                                                                                                                                                                                                            |                            |                            |     |                            |     |     |      |        |     |     |            |        |     |     |     |        |         |        |    |        |    |     |       |        |     |                     |            |                     |          |                     |    |   |            |      |        |      |
| <b>Co-morbidity:</b><br>Diabetes Mellitus (PTDM)<br>Hypertension<br>Obesity<br>Smoker                           | <b>Current Medication:</b>                                                                                                                                                                                                                                                                                                                                                                                                                                                                                                                                                                                                                                                                                                               |                            |                            |     |                            |     |     |      |        |     |     |            |        |     |     |     |        |         |        |    |        |    |     |       |        |     |                     |            |                     |          |                     |    |   |            |      |        |      |
| <b>Current complaints:</b>                                                                                      |                                                                                                                                                                                                                                                                                                                                                                                                                                                                                                                                                                                                                                                                                                                                          |                            |                            |     |                            |     |     |      |        |     |     |            |        |     |     |     |        |         |        |    |        |    |     |       |        |     |                     |            |                     |          |                     |    |   |            |      |        |      |
|                                                                                                                 | <b>Smoker?</b><br><b>Alcohol?</b>                                                                                                                                                                                                                                                                                                                                                                                                                                                                                                                                                                                                                                                                                                        |                            |                            |     |                            |     |     |      |        |     |     |            |        |     |     |     |        |         |        |    |        |    |     |       |        |     |                     |            |                     |          |                     |    |   |            |      |        |      |
| <b>Examination:</b><br>BP:                      mmHg<br>Weight:                Kg            BMI:<br>Urine dip: | <table border="1"> <tr> <td>Bil</td> <td>umol/L</td> <td>eGR</td> <td>mls/min/1.73m<sup>2</sup></td> </tr> <tr> <td>ALT</td> <td>u/L</td> <td>Urea</td> <td>mmol/L</td> </tr> <tr> <td>ALP</td> <td>u/L</td> <td>Creatinine</td> <td>umol/L</td> </tr> <tr> <td>Alb</td> <td>g/L</td> <td>Na+</td> <td>mmol/L</td> </tr> <tr> <td>Glucose</td> <td>mmol/L</td> <td>K+</td> <td>mmol/L</td> </tr> <tr> <td>Hb</td> <td>g/L</td> <td>Urate</td> <td>umol/L</td> </tr> <tr> <td>WBC</td> <td>x10<sup>9</sup>/L</td> <td>Neutrophil</td> <td>x10<sup>9</sup>/L</td> </tr> <tr> <td>Platelet</td> <td>x10<sup>9</sup>/L</td> <td>PT</td> <td>s</td> </tr> <tr> <td>Tacrolimus</td> <td>ug/L</td> <td>Neoral</td> <td>ug/L</td> </tr> </table> | Bil                        | umol/L                     | eGR | mls/min/1.73m <sup>2</sup> | ALT | u/L | Urea | mmol/L | ALP | u/L | Creatinine | umol/L | Alb | g/L | Na+ | mmol/L | Glucose | mmol/L | K+ | mmol/L | Hb | g/L | Urate | umol/L | WBC | x10 <sup>9</sup> /L | Neutrophil | x10 <sup>9</sup> /L | Platelet | x10 <sup>9</sup> /L | PT | s | Tacrolimus | ug/L | Neoral | ug/L |
| Bil                                                                                                             | umol/L                                                                                                                                                                                                                                                                                                                                                                                                                                                                                                                                                                                                                                                                                                                                   | eGR                        | mls/min/1.73m <sup>2</sup> |     |                            |     |     |      |        |     |     |            |        |     |     |     |        |         |        |    |        |    |     |       |        |     |                     |            |                     |          |                     |    |   |            |      |        |      |
| ALT                                                                                                             | u/L                                                                                                                                                                                                                                                                                                                                                                                                                                                                                                                                                                                                                                                                                                                                      | Urea                       | mmol/L                     |     |                            |     |     |      |        |     |     |            |        |     |     |     |        |         |        |    |        |    |     |       |        |     |                     |            |                     |          |                     |    |   |            |      |        |      |
| ALP                                                                                                             | u/L                                                                                                                                                                                                                                                                                                                                                                                                                                                                                                                                                                                                                                                                                                                                      | Creatinine                 | umol/L                     |     |                            |     |     |      |        |     |     |            |        |     |     |     |        |         |        |    |        |    |     |       |        |     |                     |            |                     |          |                     |    |   |            |      |        |      |
| Alb                                                                                                             | g/L                                                                                                                                                                                                                                                                                                                                                                                                                                                                                                                                                                                                                                                                                                                                      | Na+                        | mmol/L                     |     |                            |     |     |      |        |     |     |            |        |     |     |     |        |         |        |    |        |    |     |       |        |     |                     |            |                     |          |                     |    |   |            |      |        |      |
| Glucose                                                                                                         | mmol/L                                                                                                                                                                                                                                                                                                                                                                                                                                                                                                                                                                                                                                                                                                                                   | K+                         | mmol/L                     |     |                            |     |     |      |        |     |     |            |        |     |     |     |        |         |        |    |        |    |     |       |        |     |                     |            |                     |          |                     |    |   |            |      |        |      |
| Hb                                                                                                              | g/L                                                                                                                                                                                                                                                                                                                                                                                                                                                                                                                                                                                                                                                                                                                                      | Urate                      | umol/L                     |     |                            |     |     |      |        |     |     |            |        |     |     |     |        |         |        |    |        |    |     |       |        |     |                     |            |                     |          |                     |    |   |            |      |        |      |
| WBC                                                                                                             | x10 <sup>9</sup> /L                                                                                                                                                                                                                                                                                                                                                                                                                                                                                                                                                                                                                                                                                                                      | Neutrophil                 | x10 <sup>9</sup> /L        |     |                            |     |     |      |        |     |     |            |        |     |     |     |        |         |        |    |        |    |     |       |        |     |                     |            |                     |          |                     |    |   |            |      |        |      |
| Platelet                                                                                                        | x10 <sup>9</sup> /L                                                                                                                                                                                                                                                                                                                                                                                                                                                                                                                                                                                                                                                                                                                      | PT                         | s                          |     |                            |     |     |      |        |     |     |            |        |     |     |     |        |         |        |    |        |    |     |       |        |     |                     |            |                     |          |                     |    |   |            |      |        |      |
| Tacrolimus                                                                                                      | ug/L                                                                                                                                                                                                                                                                                                                                                                                                                                                                                                                                                                                                                                                                                                                                     | Neoral                     | ug/L                       |     |                            |     |     |      |        |     |     |            |        |     |     |     |        |         |        |    |        |    |     |       |        |     |                     |            |                     |          |                     |    |   |            |      |        |      |
| <b>Notes:</b>                                                                                                   |                                                                                                                                                                                                                                                                                                                                                                                                                                                                                                                                                                                                                                                                                                                                          |                            |                            |     |                            |     |     |      |        |     |     |            |        |     |     |     |        |         |        |    |        |    |     |       |        |     |                     |            |                     |          |                     |    |   |            |      |        |      |
